# Supplementary material for: β-Cyclodextrin modified graphene oxide–magnetic nanocomposite for targeted delivery and pH-sensitive release of stereoisomeric anti-cancer drugs
Source: Royal Society of Chemistry journal article supplement (doi:10.1039/c5ra13082d), 2015-01-01
Supplement: c5ra13082d1.pdf [file c5ra13082d1.pdf]

## Supplementary information

### $\beta$ -Cyclodextrin Modified Graphene Oxide-Magnetic Nanocomposite for Targeted Delivery and pH-sensitive Release of Stereoisomeric Anti-cancer Drugs

Congli Wang, Bo Li, Weifen Niu, Shasha Hong, Bassam Saif, Songbai Wang, Chuan Dong, Shaomin Shuang \*

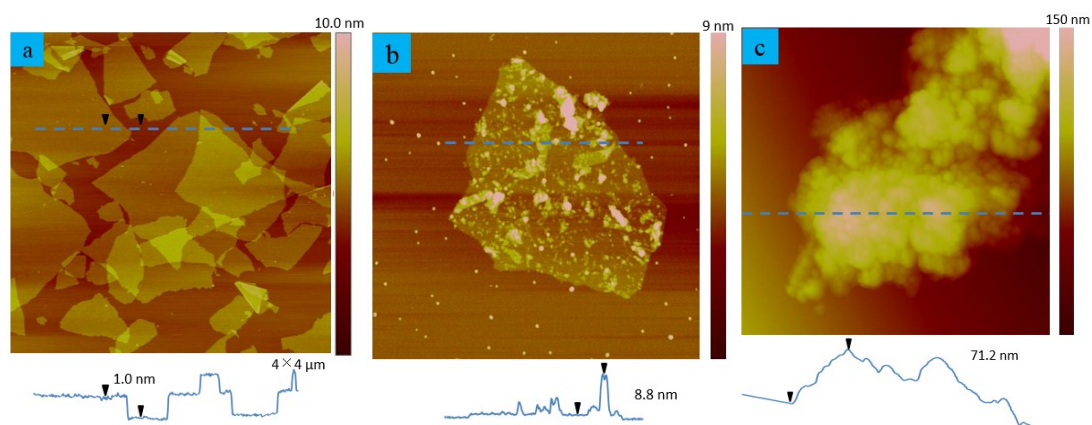

Fig. S1 The AFM images of GO (a), MG (b) and MGC (c).
